# Supplementary material for: Rasch Analysis of the Assessment of Quality of Activities (A-QOA), an Observational Tool for Clients With Dementia
Source: Oxford University Press journal article supplement (doi:10.5014/ajot.2021.039917), 2020-12-09
Supplement: 7501205040p1_ds001.xlsx [file 7501205040p1_ds001.xlsx]

## Sheet: table 1
Engaging in Activity	Expression of Emotions
1． No conditions to prevent participation in the activity*	15．No negative emotions during the activity*
2． Preparing for the activity	16．Showing a smile
3． Initiating the activity	17．Showing excitement
4． Directing one’s gaze at the activity
5． Positioning one’s body toward the activity	Social Interaction through the Activity
6． Continuing the activity	18．Interacting with others through the activity
7． Concentrating on the activity	19．Cooperating with others in the activity
8． Demonstrating activity-related knowledge and techniques	20．Sharing activity-related knowledge and techniques with others
9． Making selections /showing preferences during the activity	21．Conveying one’s intention to others
10．Working out a way to make the activity progress smoothly	22．Considering to others
	23．Sharing activity-induced emotions with others
Results of Activity
11．No negative feelings after the activity*	Verbal Expressions
12．Expressing satisfaction as a result of the activity	24．Increasing utterance
13．Expressing a sense of capability	25．Reminiscing
14．Showing willingness toward the next activity
[Scoring criteria] 4: Observed as a strong/exceptional tendency, 3: Observed, 2: Observed to a limited/questionable extent, 1: Not observed *Exception items (1, 11, 15); 4: Not observed at all, 3: Partly observed state to prevent performing the actvity, 2: Observed state to prevent performing the activity, 1: Observed storng/exceptional state to prevent performing the activity
[Examples of Scoring in the manual book] Name of the item: 16. Showing a smile Definition of the item: Observing an expression that appears pleasing with a smiling face Examples of Scoring: ₋He/She is bursting into laughter loudly during an activity (4 points: Observed as a strong/exceptional tendency). ₋He/She is temporarily smiling during an activity, but the duration of smile is short (2 point…

## Sheet: table2
FAST (severity of dementia)	N		Types of activities	Examples of activities	N
Stage 2 (age-appropriate)	4		Static activities	watching television, reading, playing board games	39
Stage 3 (borderline)	4		Dynamic activities	sports, exercises	68
Stage 4 (mild)	26		Creative/expressive activities	handicrafts, singing, dancing	106
Stage 5 (moderate)	36		Conversational activities	reminiscing	22
Stage 6 (slightly severe)	54		Daily living activites	ADL and IADL	26
Stage 7 (severe)	6		Unknown		1
Unknown	1		Total		262
Total	131
Note. FAST = Functional Assessment Staging Test

## Sheet: table3
																				Items	Difficulty	SE	Infit			Outfit
																							MnSq	z		MnSq	z
																				Preparing for the activity	2.51	.12	1.59	5.14		1.99*	4.29
																				Sharing activity−related knowledge and techniques with others	2.00	.11	1.45	4.40		1.24	1.56
																				Showing excitement	1.89	.11	.83	−2.04		.73	−2.06
																				Reminiscing	1.48	.10	1.46	4.83		1.37	2.78
																				Expressing a sense of capability	1.41	.10	.79	−2.70		.72	−2.61
																				Considering to others	.99	.10	.98	−.20		1.08	.81
																				Working out a way to make the activity progress smoothly	.97	.10	1.41	4.43		1.42	3.61
																				Showing willingness toward the next activity	.91	.10	.81	−2.47		.81	−1.90
																				Cooperating with others in the activity	.89	.10	1.12	1.47		1.09	.87
																				Making selections /showing preferences during the activity	.87	.10	1.20	2.27		1.24	2.25
																				Sharing activity−induced emotions with others	.75	.10	.69	−4.20		.67	−3.75
																				Demonstrating activity−related knowledge and techniques	.52	.10	1.37	4.05		1.34	3.27
																				Increasing utterance	.42	.10	.64	−4.99		.68	−3.83
																				Showing a smile	.41	.10	.70	−4.00		.70	−3.53
																				Expressing satisfaction as a result of the activity	.28	.10	.82	−2.26		.79	−2.39
																				Interacting with others through the activity	.28	.10	.74	−3.39		.79	−2.47
																				Conveying one’s intention to others	.20	.10	.81	−2.39		.85	−1.64
																				Concentrating on the activity	−.79	.10	.62	−5.01		.62	−4.93
																				Initiating the activity	−1.00	.10	.72	−3.56		.71	−3.64
																				Continuing the activity	−1.03	.10	.62	−5.09		.59	−5.49
																				Positioning one’s body toward the activity	−1.29	.10	.55	−6.15		.53	−6.38
																				Directing one’s gaze at the activity	−1.35	.10	.55	−6.07		.58	−5.57
																				No negative emotions during the activity	−3.06	.12	1.86*	7.83		1.75*	5.89
																				No negative feelings after the activity	−3.70	.13	1.92*	7.87		1.61	3.88
																				No conditions to prevent participation in the activity	−4.57	.15	1.71*	5.42		4.46*	9.50
																				*MnSq met the criteria to remove items
																				Note. SE = standard error, MnSq = mean square; z = z score

## Sheet: table4
																	Items	Difficulty	SE	Infit			Outfit
																				MnSq	z		MnSq	z
																	Sharing activity−related knowledge and techniques with others	2.86	.11	1.49	4.73		1.34	1.92
																	Showing excitement	2.75	.11	.86	−1.60		.77	−1.54
																	Reminiscing	2.30	.11	1.53	5.35		1.39	2.70
																	Expressing a sense of capability	2.22	.11	.87	−1.53		.81	−1.58
																	Considering to others	1.76	.10	1.06	.76		1.20	1.72
																	Working out a way to make the activity progress smoothly	1.74	.10	1.49	5.14		1.47	3.80
																	Showing willingness toward the next activity	1.67	.10	.89	−1.37		.93	−.66
																	Cooperating with others in the activity	1.65	.10	1.27	3.08		1.24	2.09
																	Making selections /showing preferences during the activity	1.63	.10	1.29	3.21		1.27	2.41
																	Sharing activity−induced emotions with others	1.49	.10	.76	−3.18		.72	−3.00
																	Demonstrating activity−related knowledge and techniques	1.23	.10	1.50	5.30		1.46	4.14
																	Increasing utterance	1.12	.10	.70	−3.97		.73	−3.09
																	Showing a smile	1.11	.10	.81	−2.37		.83	−1.87
																	Expressing satisfaction as a result of the activity	.96	.10	.93	−.79		.92	−.85
																	Interacting with others through the activity	.96	.10	.80	−2.51		.86	−1.50
																	Conveying one’s intention to others	.88	.10	.88	−1.45		.92	−.81
																	Concentrating on the activity	−.26	.11	.76	−2.92		.76	−2.72
																	Initiating the activity	−.52	.11	.85	−1.65		.85	−1.66
																	Continuing the activity	−.54	.11	.74	−3.10		.69	−3.60
																	Positioning one’s body toward the activity	−.85	.11	.63	−4.56		.59	−4.97
																	Directing one’s gaze at the activity	−.93	.11	.64	−4.40		.66	−4.03
																	Note. SE = standard error, MnSq = mean square; z = z score
